# Supplementary material for: Measurement of Orthotropic Material Constants and Discussion on 3D Printing Parameters in Additive Manufacturing
Source: MDPI journal article supplement (doi:10.3390/app12136812), 2022-07-05
Supplement: s1 [file s1]

# Supplementary Material for the manuscript “Measurement of Orthotropic Material Constants and Discussion on 3D Printing Parameters in Additive Manufacturing” Applsci-1801279

Yu-Hsi Huang and Chun-Yi Lin

**Table S1.** Natural resonance frequency of  $xy$  plane- $x$  direction test piece.

| Mode | Theory | Impact Point A |           | Impact Point B |           | FEM    | Err. (%)<br>(Theory) | Err. (%)<br>(Exp.) |
|------|--------|----------------|-----------|----------------|-----------|--------|----------------------|--------------------|
|      |        | Exp.           | Error (%) | Exp.           | Error (%) |        |                      |                    |
| 1_B  | 29.1   | 29.1           | 0.0       | 29.1           | 0.0       | 29.6   | 1.7                  | 1.7                |
| 2_B  | 182.4  | 182.8          | 0.2       | 182.4          | 0.0       | 185.0  | 1.4                  | 1.2                |
| 3_B  | 510.7  | 513.9          | 0.6       | 512.9          | 0.4       | 518.1  | 1.4                  | 0.8                |
| 4_B  | 1000.8 | 1009.6         | 0.9       |                |           | 1016.2 | 1.5                  | 0.7                |
| 5_B  | 1654.3 | 1670.8         | 1.0       | 1671.0         | 1.0       | 1680.4 | 1.6                  | 0.6                |
| 6_B  | 2471.3 | 2495.2         | 1.0       | 2525.5         | 2.2       | 2507.8 | 1.5                  | 0.5                |
| 1_T  | 331.7  |                |           | 331.7          | 0.0       | 333.4  | 0.5                  | 0.5                |
| 2_T  | 995.1  |                |           | 1014.1         | 1.9       | 1014.4 | 1.9                  | 0.0                |
| 3_T  | 1658.5 |                |           | 1738.5         | 4.8       | 1736.6 | 4.7                  | -0.1               |

B: bending mode; T: torsion mode

Unit: Hz

**Table S1-1.** Natural resonance frequency of  $xy$  plane- $y$  direction test piece.

| Mode | Theory | Impact Point A |           | Impact Point B |           | FEM    | Err. (%)<br>(Theory) | Err. (%)<br>(Exp.) |
|------|--------|----------------|-----------|----------------|-----------|--------|----------------------|--------------------|
|      |        | Exp.           | Error (%) | Exp.           | Error (%) |        |                      |                    |
| 1_B  | 26.8   | 26.8           | 0.0       | 27.1           | 1.1       | 27.3   | 2.0                  | 2.0                |
| 2_B  | 168.0  | 168.2          | 0.1       | 170.1          | 1.3       | 170.9  | 1.8                  | 1.6                |
| 3_B  | 470.4  | 473.1          | 0.6       | 478.5          | 1.7       | 478.6  | 1.7                  | 1.2                |
| 4_B  | 921.7  | 928.7          | 0.8       | 940.7          | 2.1       | 938.6  | 1.8                  | 1.1                |
| 5_B  | 1523.5 | 1537.4         | 0.9       | 1557.3         | 2.2       | 1552.2 | 1.9                  | 1.0                |
| 6_B  | 2276.0 | 2299.9         | 1.1       | 2330.0         | 2.4       | 2317.1 | 1.8                  | 0.7                |
| 1_T  | 328.9  |                |           | 328.9          | 0.0       | 327.7  | -0.4                 | -0.4               |
| 2_T  | 986.7  |                |           | 1003.4         | 1.7       | 995.6  | 0.9                  | -0.8               |
| 3_T  | 1644.5 |                |           | 1719.6         | 4.6       | 1699.5 | 3.3                  | -1.2               |

B: bending mode; T: torsion mode

Unit: Hz

**Table S1-2.** Natural resonance frequency of  $xz$  plane- $x$  direction test piece.

| Mode | Theory | Impact Point A |           | Impact Point B |           | FEM    | Err. (%)<br>(Theory) | Err. (%)<br>(Exp.) |
|------|--------|----------------|-----------|----------------|-----------|--------|----------------------|--------------------|
|      |        | Exp.           | Error (%) | Exp.           | Error (%) |        |                      |                    |
| 1_B  | 29.7   | 29.7           | 0.0       | 29.7           | 0.0       | 30.6   | 3.0                  | 3.0                |
| 2_B  | 186.1  | 186.9          | 0.4       | 187.1          | 0.5       | 191.3  | 2.8                  | 2.3                |
| 3_B  | 521.3  | 522.3          | 0.2       | 522.5          | 0.2       | 534.9  | 2.6                  | 2.4                |
| 4_B  | 1021.5 | 1016.2         | -0.5      |                |           | 1046.8 | 2.5                  | 3.0                |
| 5_B  | 1688.4 | 1658.4         | -1.8      | 1665.5         | -1.4      | 1726.8 | 2.3                  | 4.1                |
| 6_B  | 2522.3 | 2455.9         | -2.6      | 2514.9         | -0.3      | 2571.4 | 1.9                  | 4.7                |
| 1_T  | 332.2  |                |           | 332.2          | 0.0       | 335.8  | 1.1                  | 1.1                |
| 2_T  | 996.6  |                |           | 1021.1         | 2.5       | 1022.1 | 2.6                  | 0.1                |
| 3_T  | 1661.0 |                |           | 1738.7         | 4.7       | 1750.5 | 5.4                  | 0.7                |

B: bending mode; T: torsion mode

Unit: Hz

**Table S1-3.** Natural resonance frequency of  $xz$  plane- $z$  direction test piece.

| Mode | Theory | Impact Point A |           | Impact Point B |           | FEM    | Err. (%)<br>(Theory) | Err. (%)<br>(Exp.) |
|------|--------|----------------|-----------|----------------|-----------|--------|----------------------|--------------------|
|      |        | Exp.           | Error (%) | Exp.           | Error (%) |        |                      |                    |
| 1_B  | 22.5   | 22.5           | 0.0       | 22.5           | 0.0       | 22.6   | 0.5                  | 0.5                |
| 2_B  | 141.0  | 141.2          | 0.1       | 141.4          | 0.3       | 141.6  | 0.4                  | 0.3                |
| 3_B  | 394.9  | 397.5          | 0.7       | 398.5          | 0.9       | 396.1  | 0.3                  | -0.4               |
| 4_B  | 773.8  | 780.3          | 0.8       | 782.8          | 1.2       | 775.7  | 0.2                  | -0.6               |
| 5_B  | 1279.1 | 1293.8         | 1.1       | 1298.1         | 1.5       | 1281.0 | 0.1                  | -1.0               |
| 6_B  | 1910.8 | 1938.1         | 1.4       | 1943.4         | 1.7       | 1910.4 | 0.0                  | -1.4               |
| 1_T  | 278.3  |                |           | 278.3          | 0.0       | 279.6  | 0.4                  | 0.4                |
| 2_T  | 834.9  |                |           | 848.9          | 1.7       | 848.5  | 1.6                  | 0.0                |
| 3_T  | 1391.5 |                |           | 1452.4         | 4.4       | 1446.3 | 3.9                  | -0.4               |

B: bending mode; T: torsion mode

Unit: Hz

**Table S1-4.** Natural resonance frequency of  $yz$  plane- $y$  direction test piece.

| Mode | Theory | Impact Point A |           | Impact Point B |           | FEM    | Err. (%)<br>(Theory) | Err. (%)<br>(Exp.) |
|------|--------|----------------|-----------|----------------|-----------|--------|----------------------|--------------------|
|      |        | Exp.           | Error (%) | Exp.           | Error (%) |        |                      |                    |
| 1_B  | 55.9   | 55.9           | 0.0       | 55.9           | 0.0       | 56.7   | 1.5                  | 1.5                |
| 2_B  | 350.3  | 348.3          | -0.6      | 348.1          | -0.6      | 353.4  | 0.9                  | 1.5                |
| 3_B  | 981.1  | 966.4          | -1.5      | 966.4          | -1.5      | 983.7  | 0.3                  | 1.8                |
| 4_B  | 1922.6 | 1878.4         | -2.3      |                |           | 1912.2 | -0.5                 | 1.8                |
| 5_B  | 3177.8 | 3080.4         | -3.1      | 3081.5         | -3.0      | 3127.6 | -1.6                 | 1.5                |
| 6_B  | 4747.3 | 4540.4         | -4.4      | 4553.5         | -4.1      | 4608.7 | -2.9                 | 1.5                |
| 1_T  | 641.0  |                |           | 641.0          | 0.0       | 610.5  | -4.8                 | -4.8               |
| 2_T  | 1923.0 |                |           | 1927.4         | 0.2       | 1852.8 | -3.7                 | -3.9               |
| 3_T  | 3205.0 |                |           | 3298.7         | 2.9       | 3156.2 | -1.5                 | -4.3               |

B: bending mode; T: torsion mode

Unit: Hz

**Table S1-5.** Natural resonance frequency of  $yz$  plane- $z$  direction test piece.

| Mode | Theory | Impact Point A |           | Impact Point B |           | FEM    | Err. (%)<br>(Theory) | Err. (%)<br>(Exp.) |
|------|--------|----------------|-----------|----------------|-----------|--------|----------------------|--------------------|
|      |        | Exp.           | Error (%) | Exp.           | Error (%) |        |                      |                    |
| 1_B  | 54.7   | 54.7           | 0.0       | 54.9           | 0.4       | 55.0   | 0.5                  | 0.5                |
| 2_B  | 342.8  | 345.7          | 0.8       | 344.9          | 0.6       | 342.7  | 0.0                  | -0.9               |
| 3_B  | 960.0  | 966.4          | 0.7       | 963.7          | 0.4       | 953.8  | -0.6                 | -1.3               |
| 4_B  | 1881.3 | 1878.4         | -0.2      | 1878.2         | -0.2      | 1853.9 | -1.5                 | -1.3               |
| 5_B  | 3109.6 | 3083.9         | -0.8      | 3079.4         | -1.0      | 3031.8 | -2.5                 | -1.7               |
| 6_B  | 4645.4 | 4540.0         | -2.3      | 4547.6         | -2.1      | 4467.3 | -3.8                 | -1.6               |
| 1_T  | 635.0  |                |           | 635.0          | 0.0       | 603.9  | -4.9                 | -4.9               |
| 2_T  | 1905.0 |                |           | 1935.0         | 1.6       | 1831.9 | -3.8                 | -5.3               |
| 3_T  | 3175.0 |                |           | 3291.1         | 3.7       | 3118.1 | -1.8                 | -5.3               |

B: bending mode; T: torsion mode

Unit: Hz
